# Supplementary material for: Multiplex detection of quality indicator molecule targets in urine using programmable hairpin probes based on a simple double-T type microchip electrophoresis platform and isothermal polymerase-catalyzed target recycling
Source: Royal Society of Chemistry journal article supplement (doi:10.1039/c8an00141c), 2018-01-01
Supplement: c8an00141c1.pdf [file c8an00141c1.pdf]

## Supporting Information

### **Multiplex detection of quality indicator molecules targets in urine using programmable hairpin probes based on a simple double-T type microchip electrophoresis platform and isothermal polymerase-catalyzed target recycle**

Lingying Zhou<sup>a</sup>, Ning Gan<sup>\*,a</sup>, Yongxiang<sup>a</sup> Wu Futao Hu<sup>b</sup>, Jianyuan Lin<sup>c</sup>, Yuting Cao<sup>a</sup>, Dazhen Wu<sup>a</sup>

a. Faculty of Materials Science and Chemical Engineering, Ningbo University, Ningbo, 315211, China

b. Faculty of Marine, Ningbo University, Ningbo, 315211, China

c College of Biological & Environmental Sciences, Zhejiang Wanli University, Ningbo, China, 315100

\*Corresponding Author Tel: +86-574-87609987; Fax: +86-574-8760998

E-mail address: ganning@nbu.edu.cn

**Table.S1** Sequence oligonucleotides used in this strategy-----3  
**TableS2.** Voltage program applied for sample injection and MCE separation-----4  
**FigS1.** The whole configuration of microchip electrophoresis system-----5

**TableS1.** Sequence oligonucleotides used in this strategy

| Name       | Sequence (5'—3')                                                                                                                 |
|------------|----------------------------------------------------------------------------------------------------------------------------------|
| PHP-AMP    | TCGGCTTAGCTCGGCTTAGCTCGGCTTAGCTTTT <b><u>GC</u></b><br><b><u>GGGCGGTTGTATAGCGGTTTTTTTTTTACAACCGC</u></b><br><b><u>CCGC</u></b>   |
| PHP-ATP    | TTTTTTTTTACCT <b><u>TGGGGGAGTATTGCGGAGGAAG</u></b><br><b><u>GTTTTTCAATACTCCCCCA</u></b>                                          |
| PHP-E2     | ATACGAGCTTGTTCAATACGAAGGGATGCCGTTT<br><b><u>GGCCCCAAGTTCGGCATAGTGTGGTGATAGTAA</u></b><br><b><u>GAGCAATCTTTTTCACCACACTATG</u></b> |
| Primer-AMP | GCGGGCGGTT                                                                                                                       |
| Primer-ATP | TGGGGGAGTA                                                                                                                       |
| Primer-E2  | CATAGTGTGG                                                                                                                       |

Note: The bold sequences were the targets' aptamer nucleotides. The underline sequences in PHP represent the sequence complementary to each other to form the hairpin structure

**TableS2.** Voltage program applied for sample injection and MCE separation.

| Procedure        | Time(s) | Voltage applied into the reservoirs (V) |     |     |      |
|------------------|---------|-----------------------------------------|-----|-----|------|
|                  |         | S                                       | B   | SW  | BW   |
| sample injection | 50      | 280                                     | 320 | 510 | 0    |
| MCE separation   | 185     | 250                                     | 0   | 250 | 1000 |

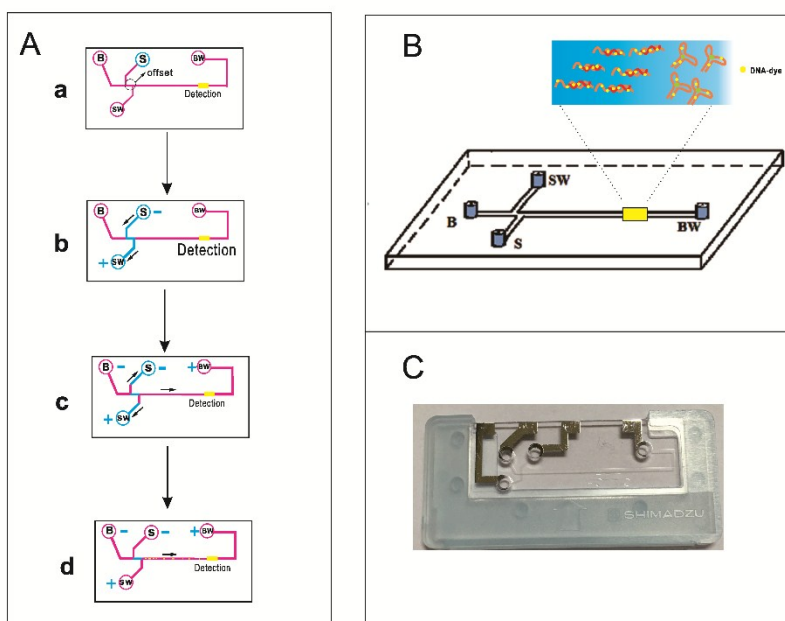

**FigS1** (A) Illustration of sample analysis procedures based on the commercial MCE system : (a) a chip preparation. (b) sample loading phase; (c)sample injection phase; (d)sample separation. (B) The diagram of separated species being detected in the by MCE system. (C) The image of microchip for analysis. S (sample); SW (sample waste); B (separation buffer); BW (buffer waste).
